# Supplementary material
Source: MDPI journal article supplement (https://www.mdpi.com/2071-1050/13/17/9609)
Supplement: s1 [file s1]

# Supplement Material

Table S1. Summary of the reviewed articles

| Case study |              | Country   | UA                | Land ownership | Benefits   |    |                  |    |           |     | Special benefited groups | Challenges         |    |    |    |     |                            | Government support                                  | Reference |
|------------|--------------|-----------|-------------------|----------------|------------|----|------------------|----|-----------|-----|--------------------------|--------------------|----|----|----|-----|----------------------------|-----------------------------------------------------|-----------|
| City       | Country      |           |                   |                | status     | HE | SR               | Ed | Ecn       | Eco |                          | CR                 | LR | FR | HR | LIR | IR                         |                                                     |           |
| 1          | Singapore    | Singapore | Developed country | CA, CEA        |            |    |                  | ✓  |           | ✓   |                          |                    | ✓  | ✓  |    | ✓   | Inter-agency collaboration | [27]                                                |           |
| 2          | Singapore    | Singapore |                   | CG, HG         |            | ✓  |                  |    |           |     |                          |                    |    |    |    |     |                            | Incorporate CG to urban designing                   | [52]      |
| 3          | General      | Israel    |                   | CG             |            | ✓  | ✓                | ✓  |           | ✓   | Apartment residents      |                    | ✓  | ✓  |    |     | ✓                          |                                                     | [34]      |
| 4          | Greece       | Thermi    |                   | AG, IG         | Government | ✓  | ✓                | ✓  |           |     |                          |                    |    |    |    |     |                            | Free access to water, training on organic gardening | [71]      |
| 5          | General      |           |                   | CG             |            | ✓  | ✓                | ✓  | ✓         | ✓   |                          |                    |    |    |    |     |                            |                                                     | [94]      |
| 6          | General      | Germany   |                   | CG, IG         |            |    | ✓<br>(CG and IG) |    | ✓<br>(IG) |     |                          |                    |    |    |    |     |                            |                                                     | [55]      |
| 7          | Belgrade     | Serbia    |                   | CG             | Private    | ✓  | ✓                |    | ✓         |     | Elders                   |                    |    |    |    | ✓   |                            |                                                     | [19]      |
| 8          | Toulouse     | France    |                   | IG             |            |    | ✓                |    | ✓         |     |                          |                    | ✓  | ✓  |    |     | ✓                          |                                                     | [30]      |
| 9          | New York     | USA       |                   | CEA, ING, CA   |            |    | ✓                | ✓  | ✓         |     | Low-income people        |                    | ✓  |    |    |     |                            | Legislations to use public spaces for UA            | [37]      |
| 10         | Three cities |           |                   | CG             |            |    | ✓                | ✓  |           |     |                          | Immigrants, Elders |    |    |    |     |                            |                                                     |           |

| Case study |                                      | Country           | UA                  | Land                                           | Benefits |    |    |     |     |    | Special benefited groups            | Challenges |    |    |     |    |   | Government support                   | Reference |
|------------|--------------------------------------|-------------------|---------------------|------------------------------------------------|----------|----|----|-----|-----|----|-------------------------------------|------------|----|----|-----|----|---|--------------------------------------|-----------|
| City       | Country                              |                   |                     |                                                | HE       | SR | Ed | Ecn | Eco | CR |                                     | LR         | FR | HR | LIR | IR | O |                                      |           |
| 11         | California Central Coast             | USA               | CG                  |                                                | ✓        | ✓  | ✓  |     |     |    |                                     |            |    |    |     |    |   |                                      | [31]      |
| 12         | Toledo, Ohio                         |                   | CG and ING          |                                                |          | ✓  |    | ✓   | ✓   |    | Minority, Low income people         | ✓          | ✓  |    |     |    | ✓ | Support from the politicians         | [14]      |
| 13         | Boston                               |                   | CG                  |                                                | ✓        | ✓  | ✓  | ✓   |     |    |                                     |            |    |    |     |    | ✓ |                                      | [2]       |
| 14         | Chicago                              |                   | HG                  |                                                |          | ✓  |    | ✓   |     |    | Migrants                            |            | ✓  | ✓  |     |    |   |                                      | [85]      |
| 15         | California's San Francisco Bay Area, |                   | CG, HG              |                                                | ✓        | ✓  | ✓  |     |     |    |                                     |            |    |    |     |    |   |                                      | [28]      |
| 16         | South Tyrol                          | Developed country | AG                  | Mostly municipal owned and few privately owned | ✓        | ✓  |    | ✓   |     |    | Elders, Disabled people, Pensioners |            |    |    |     |    |   |                                      | [18]      |
| 17         | Milan                                |                   | CG                  |                                                |          | ✓  |    |     |     |    | Seniors, Retired people             |            |    |    |     |    |   |                                      | [80]      |
| 18         | Bologna                              |                   | CG                  |                                                |          | ✓  | ✓  | ✓   |     |    |                                     |            | ✓  |    | ✓   |    | ✓ | Collaboration with municipal council | [35]      |
| 19         | Campania                             |                   | CG, Urban Parks, HG |                                                | ✓        | ✓  | ✓  | ✓   | ✓   | ✓  | People with mental disorders,       |            |    |    |     |    |   |                                      | [78]      |

|            |                  |        | School children   |                        |                     |          |    |     |     |    |                          |                   |    |    |     |                                                   |                                             |           |
|------------|------------------|--------|-------------------|------------------------|---------------------|----------|----|-----|-----|----|--------------------------|-------------------|----|----|-----|---------------------------------------------------|---------------------------------------------|-----------|
| 20         | Saitama          | Japan  | Czech Republic    | AG                     | Public, Private     | ✓        | ✓  |     |     |    |                          |                   |    | ✓  | ✓   | [45]                                              |                                             |           |
| 21         | Brno             | Prague |                   | AG                     | Mostly private      | ✓        | ✓  | ✓   |     |    |                          |                   |    |    | ✓   | ✓                                                 | [82]                                        |           |
| 22         |                  |        |                   | CG                     | Public, Private     | ✓        | ✓  |     |     |    |                          |                   |    |    |     | [29]                                              |                                             |           |
| Case study |                  |        | GN/GS             | UA model               | Land ownership      | Benefits |    |     |     |    | Special benefited groups | Challenges        |    |    |     |                                                   | Government support                          | Reference |
| City       | Country          | HE     |                   |                        |                     | SR       | Ed | Ecn | Eco | CR |                          | LR                | FR | HR | LIR | IR                                                |                                             |           |
| 23         | Baeza, Andalusia | Spain  | Developed country | AG                     |                     | ✓        | ✓  | ✓   | ✓   | ✓  |                          |                   |    |    |     |                                                   | Land allocation, install irrigation systems | [62]      |
| 24         | Barcelona        |        |                   | AG                     | Public and squatted | ✓        | ✓  | ✓   | ✓   | ✓  |                          |                   |    |    |     |                                                   | Integrate into city planning regulations    | [16]      |
| 25         | London           |        |                   | Micro farms            | Public, Private     |          | ✓  |     | ✓   |    |                          |                   |    |    |     |                                                   | [21]                                        |           |
| 26         | Salford          | UK     |                   | Guerrilla gardening    |                     | ✓        |    |     | ✓   |    |                          |                   |    |    |     | Guerrilla group was encouraged by local authority | [44]                                        |           |
| 27         | Glasgow          |        |                   | CG, Market gardens, AG | Public, Private     | ✓        | ✓  | ✓   | ✓   | ✓  | ✓                        | Unemployed people | ✓  | ✓  |     |                                                   | Informal support from local politicians,    | [92]      |

|                |                 |             |                                    |         |   |   |   |                 |      | Leasing lands                          |      |
|----------------|-----------------|-------------|------------------------------------|---------|---|---|---|-----------------|------|----------------------------------------|------|
| 28Wythenshawe, |                 |             | CG                                 | Private | ✓ | ✓ | ✓ | Cancer patients | [83] |                                        |      |
| 29             | South Australia | Australia   | HG                                 |         |   |   | ✓ | ✓               | ✓    | ✓                                      | [74] |
| 30             | Adeleid,        |             | HG, ING                            |         | ✓ |   | ✓ | ✓               | ✓    | ✓                                      | [24] |
| 31             | General         | Netherlands | AG                                 |         | ✓ |   |   | Elders          | [88] |                                        |      |
| 32             | Poznan          | Poland      | CG                                 |         | ✓ | ✓ | ✓ | ✓               |      | ✓ Grants by Municipal councils         | [61] |
| 33             | General         |             | AG                                 |         | ✓ |   | ✓ |                 |      | ✓ Legislations                         | [9]  |
| 34             | Zagreb          | Craotia     | CG, Guerilla gardens, City gardens |         | ✓ |   |   | ✓               | ✓    | ✓ Municipal council-initiated projects | [40] |

| Case study |            | Country | Country status    | UA model | Land ownership               | Benefits |    |    |     |     |    | Special benefited groups | Challenges |    |    |     |    |   | Government support                                                                               | Reference |
|------------|------------|---------|-------------------|----------|------------------------------|----------|----|----|-----|-----|----|--------------------------|------------|----|----|-----|----|---|--------------------------------------------------------------------------------------------------|-----------|
| City       | Country    |         |                   |          |                              | HE       | SR | Ed | Ecn | Eco | CR |                          | LR         | FR | HR | LIR | IR | O |                                                                                                  |           |
| 35         | Stockholm  | Sweden  | Developed country | CG       | Municipal                    | ✓        | ✓  |    |     | ✓   |    |                          | ✓          | ✓  |    |     | ✓  | ✓ | Leasing gardens by city council, integrate into urban planning, provide started kits for farming | [12]      |
| 36         | 142 cities | Hungary |                   | CG       | Public (most), Private (few) |          | ✓  |    |     | ✓   |    |                          |            |    |    | ✓   |    |   |                                                                                                  | [11]      |

|    |                        |              |                    |            |                            |   |   |   |   |                                                             |                   |   |   |   |   |                                |      |      |
|----|------------------------|--------------|--------------------|------------|----------------------------|---|---|---|---|-------------------------------------------------------------|-------------------|---|---|---|---|--------------------------------|------|------|
| 37 | Kathmandu              | Nepal        | Developing country | IG, AG, CG |                            |   |   | ✓ |   | Migrants                                                    |                   |   |   |   |   | Establishing corporate markets | [65] |      |
| 38 | West Jakarta           |              |                    | IG, CA     |                            |   |   |   | ✓ |                                                             | Migrants          | ✓ |   |   | ✓ |                                |      | [20] |
| 39 | Duri, Kosambi, Jakarta | Indonesia    |                    | IG         |                            |   |   |   | ✓ | ✓                                                           |                   |   |   | ✓ | ✓ |                                |      | [15] |
| 40 | Pyin Oo Lwin           | Myanmar      |                    | CA         | Government, Private (most) | ✓ | ✓ | ✓ | ✓ | ✓                                                           | ✓                 |   |   |   |   |                                |      | [46] |
| 41 | Lào Cai                | Vietnam      |                    | IG         | Government, Private        | ✓ | ✓ |   | ✓ | ✓                                                           |                   |   |   | ✓ | ✓ |                                | ✓    | [72] |
| 42 | Freetown               | Sierra Leone |                    | IG         | Government, Private        |   |   |   | ✓ |                                                             | Law income people | ✓ | ✓ |   |   |                                | ✓    | [60] |
| 43 | Mexico City            |              |                    | CG         | Government, Private        | ✓ | ✓ | ✓ | ✓ | ✓                                                           |                   |   |   |   | ✓ |                                | ✓    | [33] |
| 44 | State of Tlaxcala      | Mexico       |                    |            |                            |   |   |   |   | Marginalized people, woman, disabled people, elderly people |                   |   |   |   |   |                                |      |      |
|    |                        |              |                    | IG, HG     |                            |   |   | ✓ |   |                                                             | ✓                 |   | ✓ |   | ✓ | ✓                              | [67] |      |

| Case study |               | Country status | UA model           | Land ownership | Benefits |    |    |     |     |    | Special benefited groups | Challenges |    |    |     |    |   | Government support | Reference |
|------------|---------------|----------------|--------------------|----------------|----------|----|----|-----|-----|----|--------------------------|------------|----|----|-----|----|---|--------------------|-----------|
| City       | Country       |                |                    |                | HE       | SR | Ed | Ecn | Eco | CR |                          | LR         | FR | HR | LIR | IR | O |                    |           |
| 45         | Shanghai      | China          | Developing country | CG             |          | ✓  | ✓  |     |     | ✓  |                          |            |    |    |     |    |   |                    | [54]      |
| 46         | Wuhan         |                |                    | CG, IG         |          | ✓  |    | ✓   | ✓   | ✓  |                          | ✓          | ✓  | ✓  |     |    | ✓ |                    | [96]      |
| 47         | Quito         | Ecuador        |                    | HG             |          | ✓  | ✓  |     | ✓   |    |                          | ✓          | ✓  | ✓  |     |    | ✓ |                    | [23]      |
| 48         | Johannersburg |                |                    | CG             |          |    | ✓  | ✓   | ✓   | ✓  |                          |            | ✓  | ✓  |     |    | ✓ |                    | [93]      |

|    |                        |              |                   |                  |   |   |   |   |   |   |   |   |   |   |      |
|----|------------------------|--------------|-------------------|------------------|---|---|---|---|---|---|---|---|---|---|------|
| 49 | Eastern Cape province  | South Africa |                   | CG               | ✓ | ✓ | ✓ |   |   |   |   |   |   |   | [77] |
| 50 | Pune                   | India        |                   | HG               |   | ✓ | ✓ | ✓ |   |   |   |   |   |   | [97] |
| 51 | Salvador, Bahia        | Brazil       |                   | CG               |   | ✓ | ✓ |   |   |   |   |   |   |   | [25] |
| 52 | Antananarivo           | Madagascar   |                   | CA               | ✓ | ✓ | ✓ | ✓ |   | ✓ |   |   |   | ✓ | [7]  |
| 53 | Bedelle town           | Ethiopia     |                   | Horticulture, HG |   |   | ✓ | ✓ |   | ✓ | ✓ | ✓ | ✓ | ✓ | [1]  |
| 54 | Temuco                 | Chile        |                   |                  |   |   |   |   |   |   |   |   |   |   |      |
|    | Lausanne, Zürich, Bern | Switzerland  | Developed country | HG               | ✓ | ✓ | ✓ | ✓ | ✓ |   |   |   |   |   | [48] |
